# Supplementary material for: Progression of the leprosy reaction and nerve damage: A prospective cohort study in children with leprosy from the Brazilian Amazon
Source: PubMed Central journal article supplement (PMC11698567; doi:10.1371/journal.pntd.0012772), 2024-12-19
Supplement: pntd.0012772.s001.pdf [file pntd.0012772.s001.pdf]

## Support Information

Values of sensory and motor functions of patients in the initial and final evaluation, emergence of deformities and its development

| Patient | Initial strength | Initial sensitivity | Final strength | Final sensitivity | Appearance new deformities | Initial total | Final total | Development |
|---------|------------------|---------------------|----------------|-------------------|----------------------------|---------------|-------------|-------------|
| 01      | 42               | 152                 | 46             | 169               | no                         | 194           | 215         | improved    |
| 02      | 50               | 200                 | 44             | 191               | no                         | 250           | 235         | worsened    |
| 03      | 50               | 183                 | 50             | 164               | no                         | 233           | 214         | worsened    |
| 04      | 49               | 203                 | 48             | 201               | no                         | 252           | 249         | worsened    |
| 05      | 50               | 201                 | 50             | 204               | no                         | 251           | 254         | improved    |
| 06      | 50               | 216                 | 50             | 216               | no                         | 266           | 266         | unchanged   |
| 07      | 47               | 210                 | 48             | 202               | no                         | 257           | 250         | worsened    |
| 08      | 50               | 203                 | 50             | 211               | no                         | 253           | 261         | improved    |
| 09      | 50               | 215                 | 50             | 205               | no                         | 265           | 255         | worsened    |
| 10      | 50               | 216                 | 50             | 216               | no                         | 266           | 266         | unchanged   |
| 11      | 46               | 215                 | 47             | 210               | no                         | 261           | 257         | worsened    |
| 12      | 50               | 216                 | 50             | 216               | no                         | 266           | 266         | unchanged   |
| 13      | 50               | 216                 | 50             | 216               | no                         | 266           | 266         | unchanged   |
| 14      | 43               | 79                  | 47             | 146               | bone resorption            | 122           | 193         | worsened    |
| 15      | 50               | 216                 | 48             | 207               | no                         | 266           | 255         | worsened    |
| 16      | 48               | 215                 | 50             | 216               | no                         | 263           | 266         | improved    |
| 17      | 50               | 216                 | 50             | 216               | no                         | 266           | 266         | unchanged   |
| 18      | 49               | 216                 | 50             | 216               | no                         | 265           | 266         | improved    |
| 19      | 47               | 201                 | 48             | 206               | no                         | 248           | 254         | improved    |
| 20      | 50               | 205                 | 50             | 213               | no                         | 255           | 263         | improved    |
| 21      | 50               | 216                 | 50             | 216               | no                         | 266           | 266         | unchanged   |
| 22      | 50               | 216                 | 50             | 216               | no                         | 266           | 266         | unchanged   |
| 23      | 50               | 216                 | 48             | 209               | no                         | 266           | 257         | worsened    |
| 24      | 43               | 148                 | 39             | 122               | bone resorption            | 191           | 161         | worsened    |
| 25      | 50               | 213                 | 47             | 185               | fallen hand                | 263           | 232         | worsened    |
| 26      | 49               | 207                 | 46             | 201               | no                         | 256           | 247         | worsened    |
| 27      | 50               | 216                 | 50             | 216               | no                         | 266           | 266         | unchanged   |
| 28      | 50               | 216                 | 50             | 216               | no                         | 266           | 266         | unchanged   |
| 29      | 50               | 216                 | 50             | 216               | no                         | 266           | 266         | unchanged   |
| 30      | 50               | 216                 | 50             | 216               | no                         | 266           | 266         | unchanged   |
| 31      | 50               | 216                 | 50             | 216               | no                         | 266           | 266         | unchanged   |
| 32      | 45               | 202                 | 44             | 176               | no                         | 247           | 220         | worsened    |
| 33      | 47               | 163                 | 47             | 174               | no                         | 210           | 221         | improved    |
| 34      | 47               | 206                 | 48             | 208               | no                         | 253           | 256         | improved    |
| 35      | 48               | 213                 | 46             | 197               | no                         | 261           | 243         | worsened    |
| 36      | 50               | 216                 | 50             | 216               | no                         | 266           | 266         | unchanged   |
| 37      | 50               | 175                 | 50             | 173               | no                         | 225           | 223         | worsened    |
| 38      | 49               | 194                 | 48             | 202               | bone resorption            | 243           | 250         | worsened    |
